# Supplementary material for: Weak association between the interleukin-8 rs4073 polymorphism and acute pancreatitis: a cumulative meta-analysis
Source: Springer Nature journal article supplement (doi:10.1186/s12881-019-0861-4), 2019-07-24
Supplement: MOESM2 [file 16986056]

| NEWCASTLE - OTTAWA QUALITY ASSESSMENT SCALE                                          | Bishu et al., 2018 | Anilir et al., 2017 | Li et al., 2015 | Chantsev and Leonov, 2014 | Chen and Nie, 2008 | Hofner et al., 2006 | Cao and Xiao, 2010 | Tang et al., 2010 | Li et al., 2007 | Bao et al., 2015 |
|--------------------------------------------------------------------------------------|--------------------|---------------------|-----------------|---------------------------|--------------------|---------------------|--------------------|-------------------|-----------------|------------------|
| <b>Selection</b>                                                                     |                    |                     |                 |                           |                    |                     |                    |                   |                 |                  |
| 1) <u>Is the case definition adequate?</u>                                           |                    |                     |                 |                           |                    |                     |                    |                   |                 |                  |
| a) yes, with independent validation ★                                                | ★                  | ★                   | ★               | ★                         | ★                  | ★                   | ★                  | ★                 | ★               | ★                |
| b) no description                                                                    |                    |                     |                 |                           |                    |                     |                    |                   |                 |                  |
| 2) <u>Representativeness of the cases</u>                                            |                    |                     |                 |                           |                    |                     |                    |                   |                 |                  |
| a) consecutive or obviously representative series of cases ★                         | ★                  | ★                   | ★               |                           | ★                  | ★                   |                    |                   |                 | ★                |
| b) potential for selection biases or not stated                                      |                    |                     |                 |                           |                    |                     |                    |                   |                 |                  |
| 3) <u>Selection of Controls</u>                                                      |                    |                     |                 |                           |                    |                     |                    |                   |                 |                  |
| a) community controls ★                                                              | ★                  | ★                   | ★               |                           | ★                  | ★                   | ★                  | ★                 |                 | ★                |
| b) hospital controls                                                                 |                    |                     |                 |                           |                    |                     |                    |                   |                 |                  |
| c) no description                                                                    |                    |                     |                 |                           |                    |                     |                    |                   |                 |                  |
| 4) <u>Definition of Controls</u>                                                     |                    |                     |                 |                           |                    |                     |                    |                   |                 |                  |
| a) no history of disease (endpoint) ★                                                | ★                  | ★                   | ★               | ★                         | ★                  |                     |                    |                   | ★               | ★                |
| b) no description of source                                                          |                    |                     |                 |                           |                    |                     |                    |                   |                 |                  |
| <b>Comparability</b>                                                                 |                    |                     |                 |                           |                    |                     |                    |                   |                 |                  |
| 1) <u>Comparability of cases and controls on the basis of the design or analysis</u> |                    |                     |                 |                           |                    |                     |                    |                   |                 |                  |
| a) study controls for confounding factors ★                                          |                    |                     |                 |                           |                    |                     |                    |                   |                 |                  |
| b) no adjustment                                                                     |                    |                     |                 |                           |                    |                     |                    |                   |                 |                  |
| <b>Exposure</b>                                                                      |                    |                     |                 |                           |                    |                     |                    |                   |                 |                  |
| 1) <u>Ascertainment of exposure</u>                                                  |                    |                     |                 |                           |                    |                     |                    |                   |                 |                  |
| a) reports genotype methods ★                                                        | ★                  | ★                   | ★               | ★                         | ★                  | ★                   | ★                  | ★                 | ★               | ★                |
| b) no description                                                                    |                    |                     |                 |                           |                    |                     |                    |                   |                 |                  |
| 2) <u>Same method of ascertainment for cases and controls</u>                        |                    |                     |                 |                           |                    |                     |                    |                   |                 |                  |
| a) yes ★                                                                             | ★                  | ★                   | ★               | ★                         | ★                  | ★                   | ★                  | ★                 | ★               | ★                |
| b) no                                                                                |                    |                     |                 |                           |                    |                     |                    |                   |                 |                  |
| Total stars                                                                          | 6                  | 6                   | 6               | 4                         | 6                  | 5                   | 4                  | 4                 | 4               | 6                |
